---

# Savory Signaling: T1R umami receptor modulates endoplasmic reticulum calcium store content and release dynamics in airway epithelial cells

Derek B McMahon<sup>1,\*</sup>, Jennifer F. Jolivet<sup>1</sup>, Li Eon Kuek<sup>1</sup>, Nithin D. Adappa<sup>1</sup>, James N. Palmer<sup>1</sup>, and Robert J Lee<sup>1,2,\*</sup>

<sup>1</sup> Department of Otorhinolaryngology, University of Pennsylvania Perelman School of Medicine, Philadelphia, Pennsylvania, USA

<sup>2</sup> Department of Physiology, University of Pennsylvania Perelman School of Medicine, Philadelphia, Pennsylvania, USA

\* Correspondence: derekbm@penncmedicine.upenn.edu (D.B.M.) or rjl@penncmedicine.upenn.edu (R.J.L.)

**Abstract:** T1Rs are expressed in solitary chemosensory cells of the upper airway where they detect apical glucose levels and repress bitter taste receptor Ca<sup>2+</sup> signaling pathways. Microbial growth leads to a decrease in apical glucose levels. T1Rs detect this change and liberate bitter taste receptor signaling, initiating an innate immune response to both kill and expel pathogens through releasing antimicrobial peptides and increasing nitric oxide production and ciliary beat frequency. However, chronic inflammation due to disease, smoking, or viral infections causes a remodeling of the airway epithelial. The resulting squamous metaplasia causes a loss of multi-ciliated cells and solitary chemosensory cells, replaced by basal epithelial cells. To understand how T1R function is altered during disease, we used basal epithelial cells as a model to study the function of T1R3 on Ca<sup>2+</sup> signaling dynamics. We found that both T1R1 and T1R3 detect amino acids and signal via cAMP, increasing the responsiveness of the cells to Ca<sup>2+</sup> signaling stimuli. Either knocking down T1R1/3 or treating wild-type cells with MEM amino acids caused a reduction in ER Ca<sup>2+</sup> content through a non-cAMP signaled pathway. Treatment with amino acids led to a reduction in downstream denatonium-induced Ca<sup>2+</sup>-signaled caspase activity. Thus, amino acids may be used to reduce unwanted apoptosis signaling in treatments containing bitter compounds.

**Keywords:** T1R1, T1R3, umami, amino acids, apoptosis, airway

---

## 1. Introduction

Upper airway epithelial cells initiate an innate immune response through taste receptor signaling pathways in retaliation against inhaled pathogens. Bitter taste receptors (T2Rs) localized to the motile cilia of multi-ciliated airway epithelial cells [1] detect 'bitter' bacterial quorum sensing molecules such as quinolones and N-Acyl homoserine lactones [2,3]. While mucus provides a physical web to ensnare pathogens, T2Rs trigger a calcium (Ca<sup>2+</sup>) signaling cascade leading to an increase in nitric oxide (NO) production while also increasing ciliary beat frequency to hasten mucociliary clearance, thus providing a means to both kill and remove ensnared pathogens [4,5].

Pathogens feed on apical glucose in the airway surface liquid. Solitary chemosensory cells (SCCs) are a rare epithelial cell type that contain both T2Rs and sweet taste receptors (T1Rs) [3,6–8]. In type 2 taste cells on the tongue, T1R1 and T1R3 dimerize to form a receptor that interacts with L-amino acids and small peptides to transduce signaling pathways leading to the sensation of umami [9] while T1R2 and T1R3 dimerize to form a taste receptor interacting with sweet tasting compounds [10,11]. On the tongue, T1R's signal through a

heterotrimeric G protein complex consisting of a  $G\alpha$ -gustducin, which activates phosphodiesterase, and  $G\beta_3$ , and  $G\gamma_{13}$  which signal for intracellular  $Ca^{2+}$  elevations [12–16]. The release of the  $G\beta\gamma$  dimer signals phospholipase C  $\beta_2$  and downstream activation of the TRPM5 channel [16,17]. This pathway ultimately leads to ATP release, stimulation of afferent gustatory neurons, and the sensation of taste.

In airway SCC's, T1R2 and 3 are expressed [18] and hypothesized to repress T2R calcium ( $Ca^{2+}$ ) signaling through detection of apical glucose [19]. Once pathogens grow and reduce apical glucose concentrations, T1R2/3 no longer represses T2R signaling within the SCC [19]. T2R's then cause a  $Ca^{2+}$ -dependent release of anti-microbial peptides from neighboring multi-ciliated cells into the apical lumen of the airway to combat infections. Thus, a typical, healthy epithelial layer T1Rs and T2Rs function as sentinels of the upper airway.

However, chronic inflammation caused by diseases such as chronic rhinosinusitis (CRS) [20], COPD [21], smoking [22], or severe asthma [23] causes a loss of cilia, reviewed in [24]. CRS is often characterized by squamous metaplasia, causing a loss of multi-ciliated cells, replacing the epithelial layer with squamous and basal epithelial cells instead [25,26]. Basal airway epithelial cells do retain some ability to produce nitric oxide in response to bitter compounds [27]. Because NO is an important antimicrobial that can damage bacterial DNA [28,29] as well as an anti-viral, -fungal, and -parasitic agent [30], therapeutics enhancing host NO production may be of use in chronic rhinosinusitis, but these therapies must be optimized to function even in diseased epithelia that have lost cilia.

While bitter compounds increase NO production, we have also shown that T2R activation induces apoptosis in squamous and/or basal airway cells [27]. Moreover, many clinical drugs (e.g., antihistamines) are known to be bitter, and thus might inadvertently activate apoptosis in some settings (e.g., as a nasal spray) when the epithelium is remodeled by inflammation. We sought to identify targets to protect airway cells from apoptotic responses-activated by T2R agonists so they can be better used as therapeutics. Here, we show that both T1R1 and T1R3 function in airway squamous and basal cells to detect amino acids. The addition of amino acids decreases denatonium-signaled caspase activity, likely through the reduction of ER  $Ca^{2+}$  stores. Thus, umami receptor T1R1/3 may play a pivotal role in reducing apoptosis activated by bitter drugs in infected airway cells.

## 2. Materials and Methods

For a detailed list of reagents used in this work, please refer to **Supplementary Table S1**

### 2.1 Western blot

For endogenous T1R1 and T1R3 immunoblot visualization, cell pellets were resuspended in RIPA Buffer (50 mM Tris pH 7.5, 150 mM NaCl, 1% IGEPAL CA-630, 1% deoxycholate, 1 mM DTT, DNase, and Roche cOmplete Protease Inhibitor Cocktail) and lysed via sonicating water bath. Protein concentrations of post 800 x g lysates were estimated by Bradford DC Assay (BioRad Laboratories) then 60  $\mu$ g protein/lane was loaded into a 4-12% Bis-Tris gel. After electrophoresis, the resulting gel was transferred to nitrocellulose and the membrane was blocked in 5% milk in Tris-Tween (50 mM Tris, 150 mM NaCl, and 0.025% Tween-20) for at least 1 hr. Primary antibody was diluted 1:1000 in Tris-Tween containing 5% bovine serum albumin and incubated for at least 2 hrs. Secondary antibody goat anti-rabbit IgG-horseradish peroxidase was diluted 1:1000 in Tris-Tween containing 5% milk. After extensive washing, blots were incubated in Clarity ECL (BioRad Laboratories) as per manufacturers protocol and resulting immunoblots were visualized using a ChemiDoc MP Imaging System (BioRad Laboratories). Final images were processed using Image Lab Software (BioRad Laboratories).

### 2.2 Live cell imaging

For intracellular Ca<sup>2+</sup> measurements, cells were loaded with either 5 μM of Fluo-8 AM or Fura-2 AM for 1 hour in HEPES-buffered Hank's Balanced Salt Solution in the dark at room temperature. For intracellular or nuclear cAMP, biosensors were transfected 48 hours prior to measurements. Fura-2 AM images were taken using Fura-2 filters (79002-ET Chroma, Rockingham, VT USA) while all other images were taken utilizing FITC or TRITC filter sets (49002-ET or 49004-ET Chroma) on an Olympus IX-83 microscope (20x 0.75 NA objective) with fluorescence xenon lamp and X-Cite 120 LED boost lamp (Excelitas Technology), excitation and emission filter wheels (Sutter Instruments, Novato, CA), Orca Flash 4.0 sCMOS camera (Hamamatsu, Tokyo) and MetaFluor software (Molecular Devices, Sunnyvale CA).

### 2.3 Human primary cell culture

Primary human sinonasal cells were isolated from residual surgical material acquired in accordance with the University of Pennsylvania guidelines for use of residual clinical material along with the U.S. Department of Health and Human Services code of federal regulation (Title 45 CFR 46.116) and the Declaration of Helsinki. Informed consent from each patient was obtained in addition to institutional review board approval (#800614). Patients were >18 years old and either receiving surgery for sinonasal disease or other procedures.

Primary nasal epithelial cells were obtained via enzymatic digestion of sinonasal tissue then cultured as previous described [4]. Briefly, residual tissue was incubated in medium containing 1.4 mg/mL protease and 0.1 mg/mL DNase for 1 hour at 37°C. Proteases were neutralized with medium containing 10% FBS and resulting suspension of cells were incubated in a flask at 37°C 5% CO<sub>2</sub> for 2 hours in PneumaCult-Ex Plus medium (Cat. 05040, Stemcell Technologies) with 100 U/mL penicillin and 100 μg/mL streptomycin to remove non-epithelial cells. After 2 hours, unattached cells were then plated into a tissue culture dish and propagated in PneumaCult-Ex Plus medium. For differentiation, cells were grown in air-liquid interface (ALI) cultures for at least 7 days exposure to air prior to use in experiments.

### 2.4 Knockdown of T1R isoforms

Subconfluent Beas-2B cells were grown in F-12K Media with 10% FBS and 1% penicillin/streptomycin (Gibco) and transfected with either 10 nM of non-targeting, TAS1R1.6, or TAS1R3.2 RNAi duplex (Integrated DNA Technologies) for 48 hours using lipofectamine 3000 (ThermoFisher) as per manufacturer's protocol. Knockdown was validated using qPCR as described below.

### 2.5 Quantitative PCR (qPCR)

Cultured cells were resuspended in TRIzol (ThermoFisher Scientific) and either stored at -70°C or immediately used. RNA was purified via Direct-zol RNA kit (Zymo Research) subjected to RT-PCR using High-Capacity cDNA Reverse Transcription Kit (ThermoFisher Scientific). Resulting cDNA was then utilized for qPCR using Taqman Q-PCR probes in QuantStudio 5 Real-Time PCR System (ThermoFisher Scientific). Data was analyzed using Microsoft Excel and graphed in GraphPad PRISM v8.

### 2.6 Data analysis and statistics

For comparisons of only two data sets *T*-tests was used. ANOVA was utilized for more than two comparisons where Tukey-Kramer's post-test was used for comparisons of all samples, Dunnett's post-test was used to compare multiple samples to one control, and Bonferonni's post-test was used for selective pair comparisons. In all figures, (\*) *p* < 0.05, (\*\*) *p* < 0.01, (\*\*\*) *p* < 0.001, (\*\*\*\*) *p* < 0.0001, "n.s." (no statistical significance). All data represent the mean ± SEM of a minimum of 3 experiments.

### 3. Results

#### 3.1 *T1R3* is expressed in airway cells and signals through *cAMP*

While previous work established a fundamental understanding of T1R activity in SCCs of fully differentiated airway epithelial cell cultures [6–8,18,19], their expression or activity in disease states remains unexplored. We used both the non-tumorigenic lung epithelial cell line Beas-2B's and proliferating primary non-ciliated basal airway epithelial cells as a disease model along with differentiated primary airway cells, cultured in air-liquid interface as a healthy model. Quantified by qPCR, low levels of transcript for *TAS1R1*, *TAS1R2*, and *TAS1R3*, the genes encoding T1R1, T1R2, and T1R3 respectively, were expressed in both the Beas-2B and primary cells in both basal and differentiated cultures (**Figure 1a**). There was a comparable level of transcript between the Beas-2B cells and primary basal cells, suggesting that Beas-2B's are a comparable model to primary basal epithelial cells in terms of T1R signaling. Interestingly, there was a 10-fold increase in *TAS1R1* transcript in differentiated cultures relative to basal primary cells (**Figure 1a**). Additionally, in both Beas-2B's and primary basal cells, we have detected T1R1 and T1R3 protein expression via Western blot (**Figure 1b**).

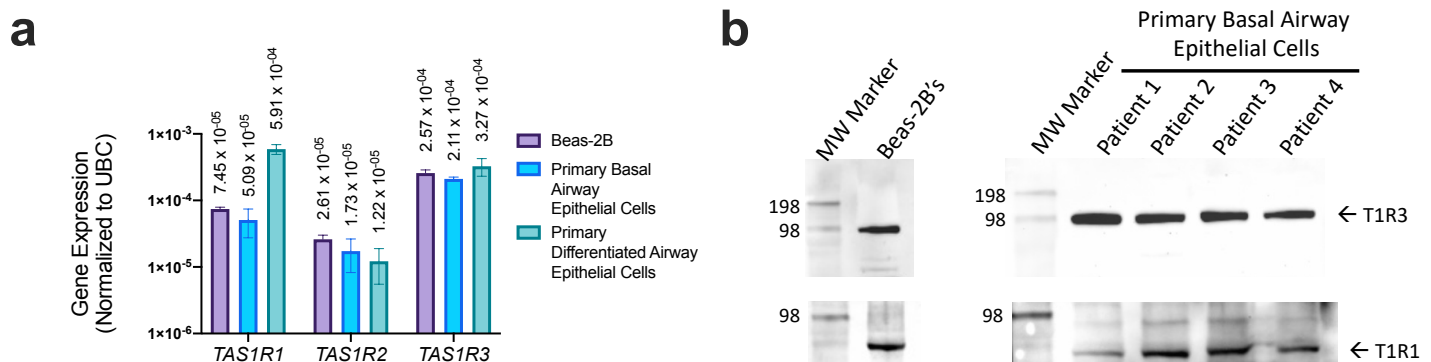

Figure 1. T1R expression in airway epithelial cells. (a) qPCR revealed *TAS1R1*, *TAS1R2*, and *TAS1R3* transcript expression (relative to housekeeping gene UBC) in Beas-2B, basal airway epithelial cells, and differentiated airway epithelial cells. (b) Both T1R1 and T1R3 proteins (predicted molecular weight of ~93 kDa) were detected via western blot using 60  $\mu$ g protein/lane of Beas-2B or primary basal epithelial cell extract. The visualized protein band representing T1R1 expression migrated slightly lower than predicted 93 kDa but was conserved across cell lines tested. This may be due to incomplete denaturation of the samples prior to SDS-PAGE; freezing or boiling samples for downstream analysis of GPCR's often leads to formations of aggregates, therefore these samples were processed on the same day without overnight storage or complete denaturation. Bar graphs display mean  $\pm$  SEM from three experiments.

Both T1R1 and T1R3 were previously reported to detect a broad range of amino acids and signal through intracellular  $Ca^{2+}$  to activate ERK1/2 and mTORC1 in MIN6 pancreatic  $\beta$  cells [31,32]. To evaluate T1R1/3 activity in airway epithelial cells, we first looked for intracellular  $Ca^{2+}$  release via addition of amino acids to see if similar pathways are present in our model. Utilizing the intracellular  $Ca^{2+}$  dye Fluo-8 and treating Beas-2B cells with a mixture of 1x MEM amino acids (MEM AA) and 1x non-essential amino acids (NEAA's) (**Supplemental Table S2**), we did not observe any changes in intracellular  $Ca^{2+}$  signaling (**Figure 2a**). Additionally, after an hour treatment with 1x MEM AA's, we did not observe any changes in baseline  $Ca^{2+}$  levels as measured by ratiometric  $Ca^{2+}$  dye Fura-2 (**Figure 2b**).

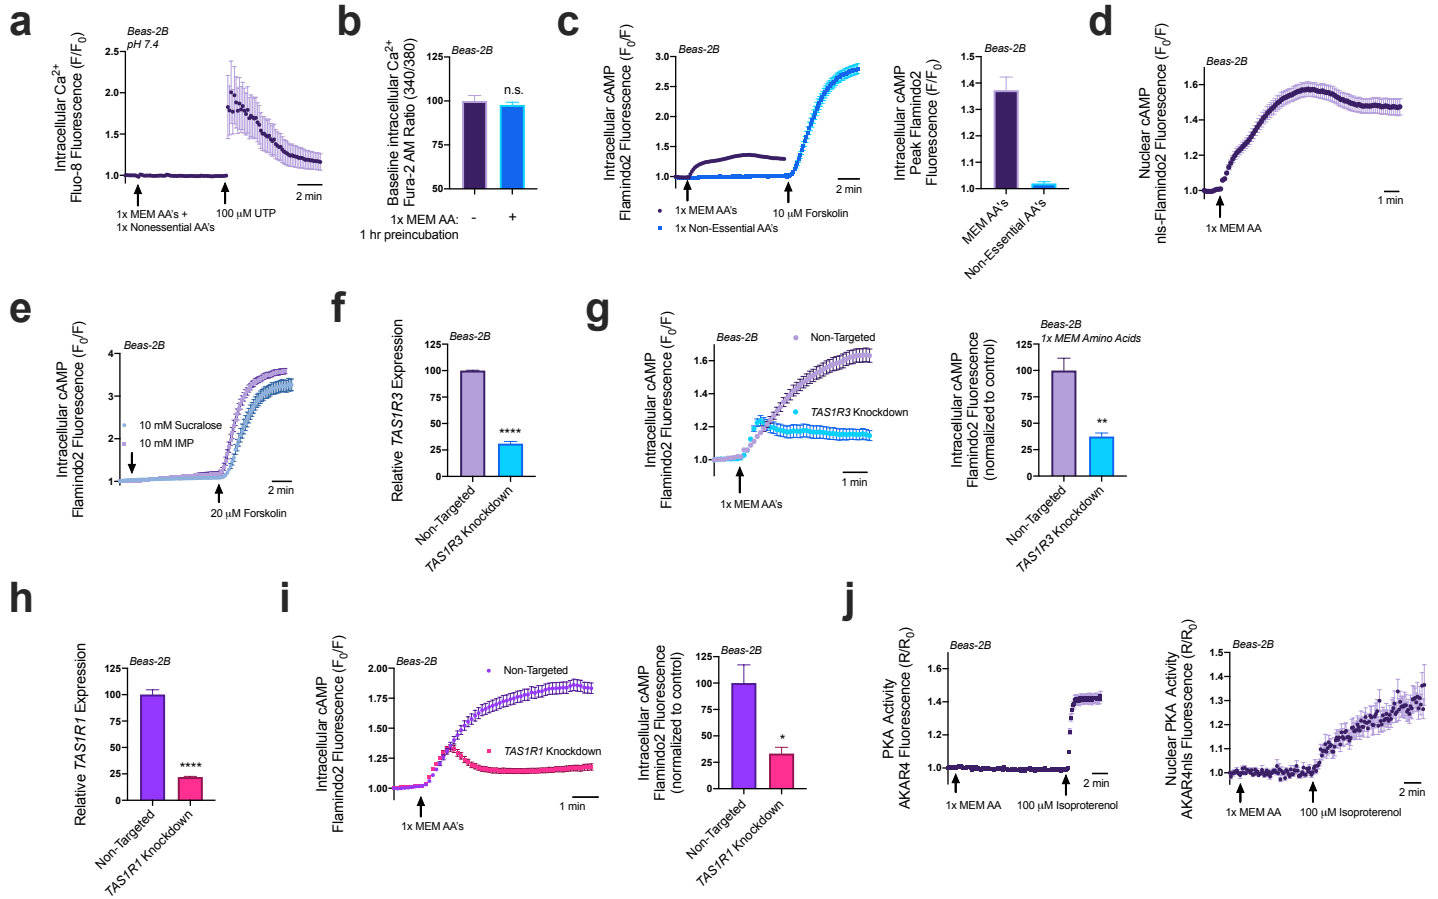

Figure 2. Amino acids and lactisole activate cAMP. (a) A pH corrected mixture of MEM amino acids (AAs) and nonessential amino acids does not induce intracellular  $\text{Ca}^{2+}$  release in Beas-2B's. (b) 1x MEM amino acids do not alter baseline intracellular  $\text{Ca}^{2+}$  levels as detected via ratiometric  $\text{Ca}^{2+}$  dye Fura-2. (c) Beas-2B's expressing cAMP biosensor Flamindo2 reveal that 1x MEM amino acids but not 1x non-essential amino acids alter intracellular cAMP levels. (d) 1x MEM AA's also elevate nuclear cAMP levels as measured in Beas-2B's expressing the Flamindo2 biosensor containing a nuclear localization (nls) sequence. (e) Neither T1R2/3 agonist sucralose nor T1R1/3 agonist inosine monophosphate (IMP) alter intracellular cAMP. (f) RNAi duplexes targeting TAS1R3 transcript reduce expression by 70% relative to non-targeting scramble controls. (g) Knocking down T1R3 impaired detection of MEM amino acids by 70% relative to non-targeting controls. (h) RNAi duplexes targeting TAS1R1 transcript reduce expression by 75% relative to non-targeting controls. (i) Knocking down T1R1 leads to a 75% reduction in cAMP signaling in response to MEM amino acids relative to non-targeting controls. (j) 1x MEM AA's do not increase either intracellular or nuclear PKA activity within the sensitivity range of the AKAR4 biosensor. Traces are representative of  $\geq 3$  experiments. Bar graphs show mean  $\pm$  SEM from  $\geq 3$  experiments. Significance determined by t-test \* $P < 0.05$ , \*\* $P < 0.01$ , \*\*\*\* $P < 0.0001$ , 'n.s.' represents no significance.

Serendipitously, we found that the addition of both 1x MEM AA and 1x NEAA's to HBSS containing 20 mM HEPES decreased the pH to 6.5, and at this pH, we found that both 1x MEM AA's and 1x NEAA's induced an intracellular  $\text{Ca}^{2+}$  elevation that was completely inhibited by a 1-hour pretreatment with 20 mM of umami antagonist lactisole (**Supplementary Figure S1a**). The addition of 20 mM lactisole did not alter the pH 6.5 of this solution. As seen in **Supplementary Figure S1b**, using the resulting pH 6.5 solution, we found that the majority of the  $\text{Ca}^{2+}$  elevations were from 1x MEM AA's (~92%) while 1x NEAA's had very little contribution (~6%). While this observation is interesting, it remains to be determined if this is

physiologically relevant. We first wanted to study the function of T1R1/3 under normal physiological pH, thus we continued experiments with buffers with pH corrected to 7.4 for the rest of this study.

Though  $\text{Ca}^{2+}$  signaling was unaffected by 1x MEM amino acids at pH 7.4, we also evaluated cAMP signaling. Utilizing genetic encoded fluorescent biosensor Flamindo2 to measure intracellular cAMP levels [33], we observed that Beas-2Bs responded to the 1x MEM AA mixture with an increase in cAMP production, while 1x NEAA's did not have this effect (**Figure 2c**). Utilizing a modified Flamindo2 construct with a nuclear localization sequence [33], we also observed that nuclear cAMP levels were also elevated in response to 1x MEM AA treatment (**Figure 2d**). However, sweet taste receptor agonist sucralose (10 mM) and umami agonist inosine monophosphate (IMP; 10 mM) did not alter intracellular cAMP levels (**Figure 2e**). To further examine whether T1R1 or T1R3 were responsible for the cAMP elevations in response to MEM amino acids, we utilized RNAi knockdown.

Using RNAi duplexes, we obtained a ~70% knockdown of *TAS1R3* expression in Beas-2Bs (**Figure 2f**). Beas-2Bs treated with RNAi, showed reduced cAMP elevations relative to cells transfected with non-targeting RNAi in response to 1x MEM AA's (**Figure 2g**). A knockdown of ~70% *TAS1R3* RNA expression yielded ~70% less cAMP. Since T1R1 dimerizes with T1R3 to comprise the umami taste receptor [9], we also evaluated if knocking down T1R1 had a similar effect on cAMP signaling. We found that a ~75% knockdown of T1R1 (**Figure 2h**) caused a ~75% reduction in 1x MEM AA generated cAMP production (**Figure 2i**). Together, these data suggest that both T1R1 and T1R3 are expressed in airway epithelial cells and function to detect at least some of the amino acids in the MEM AA mixture and then regulate cAMP.

Elevations in cAMP alters many downstream signaling pathways, canonically through Protein Kinase A (PKA) or Exchange Protein Directly Activated by cAMP (EPAC). Using Beas-2B cells expressing PKA biosensor AKAR4 [34,35] which acts as a substrate for PKA [36], we did not observe changes in intracellular or nuclear PKA activity with the addition of 1x MEM AA (**Figure 2j**). Thus, any changes in PKA, if they occur, are below the sensitivity of this biosensor. However, the Flamindo2 biosensor used above is based on the cAMP binding site of EPAC [33] and EPAC activity has been associated with ER  $\text{Ca}^{2+}$  influx and efflux pathways through modulation of the sarco/endoplasmic reticulum  $\text{Ca}^{2+}$ -ATPase (SERCA) and ryanodine (RYR) receptors [37–40]. Thus, we explored the impact that MEM AA's and T1R1/3 knockdowns had on ER  $\text{Ca}^{2+}$  content.

### 3.2 Amino acids and T1R1/3 expression impact ER $\text{Ca}^{2+}$ content

To rigorously test changes in ER  $\text{Ca}^{2+}$  content, we utilized the SERCA pump inhibitor thapsigargin. Without the constant uptake of  $\text{Ca}^{2+}$  into the ER, cells treated with thapsigargin will release their ER  $\text{Ca}^{2+}$  content into the cytosol where it can be measured using the intracellular  $\text{Ca}^{2+}$  binding dye Fluo-8. The  $\text{Ca}^{2+}$  will then dissipate into the extracellular space where it will be chelated by EGTA in the surrounding 0- $\text{Ca}^{2+}$  HBSS buffer. This allows us to observe the release of total ER  $\text{Ca}^{2+}$  content without re-uptake of  $\text{Ca}^{2+}$  across the plasma membrane or ER membranes. The addition of 1x MEM AA's caused a 35% decrease in ER  $\text{Ca}^{2+}$  content (**Figure 3a**). As expected given these findings, the addition of 1x MEM AA's to cultures of Beas-2B's led to a 50% decrease in  $\text{Ca}^{2+}$  elevation from 100  $\mu\text{M}$  of histamine treatment (**Figure 3b**). These results suggest that 1x MEM AA's lowers ER  $\text{Ca}^{2+}$  levels and impacts downstream  $\text{Ca}^{2+}$  signaling pathways.

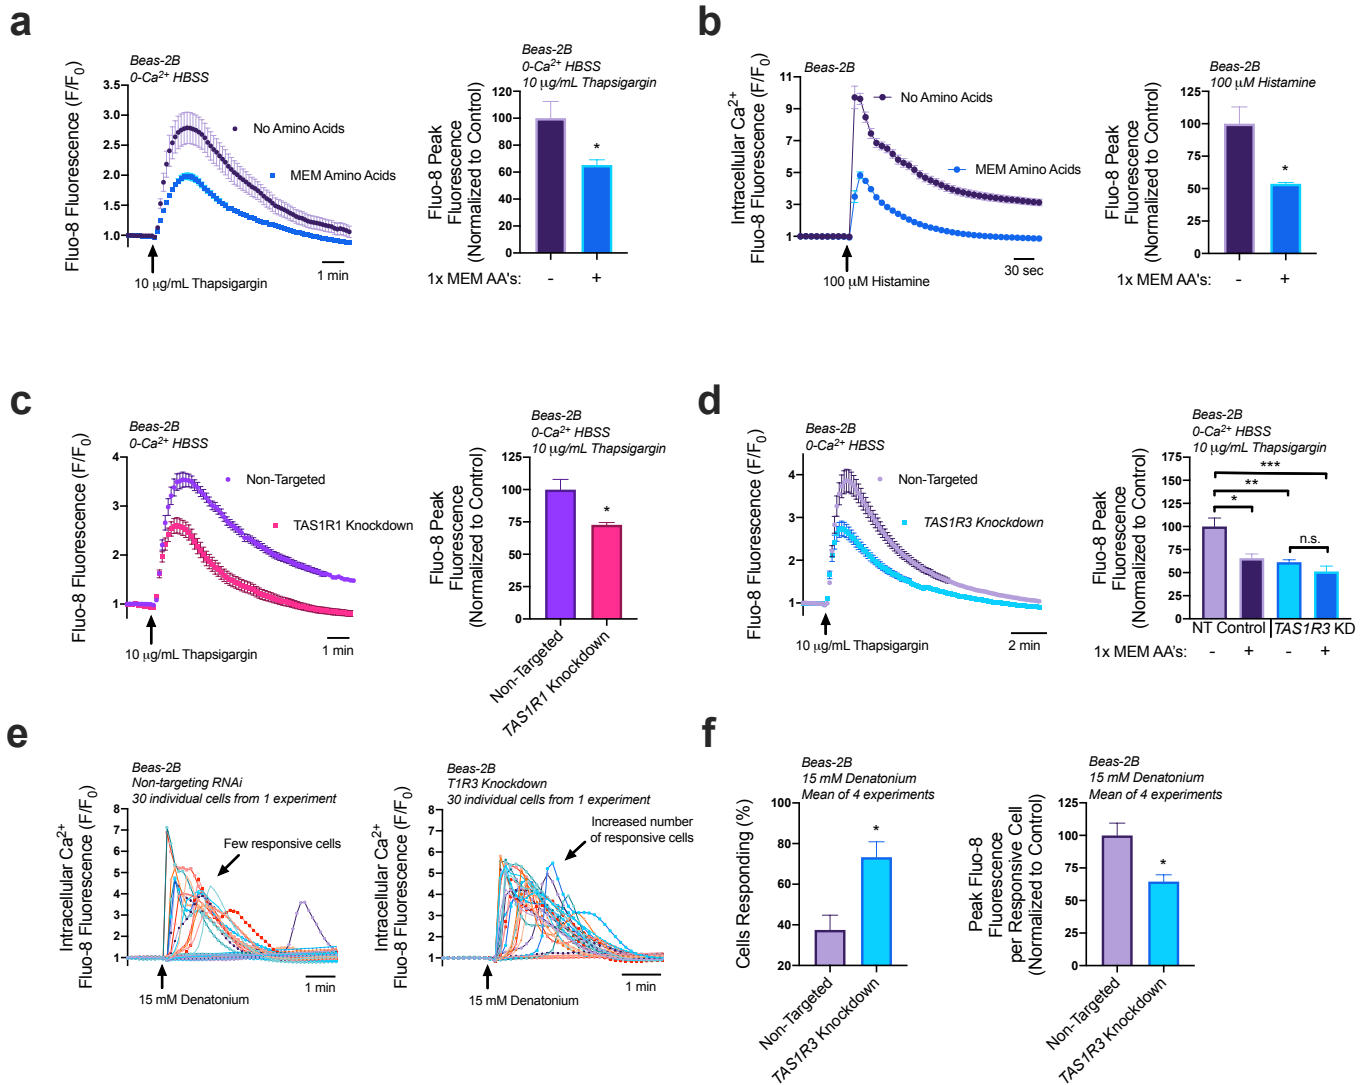

Figure 3. Both T1R1/3 and amino acids impact ER Ca<sup>2+</sup> content and release. (a) Beas-2B's treated with SERCA-pump inhibitor thapsigargin contain ~40% reduced ER Ca<sup>2+</sup> content when in the presence of 1x MEM amino acids relative to untreated controls. (b) Addition of 1x MEM AA to Beas-2B's decreased peak Ca<sup>2+</sup> release via 100 μM Histamine treatment by 50%. (c) Beas-2B's with knocked-down T1R1 contained 25% reduced ER Ca<sup>2+</sup> content relative to non-targeting RNAi controls. (d) T1R3 knockdown cultures had 30% reduced ER Ca<sup>2+</sup> content relative to non-targeting controls, an effect that was not further altered by amino acid treatment. (e) Knocking down T1R3 in Beas-2B's led to an increase in the number of cells responsive to denatonium. (f) Quantifying the results from (e), knocking down T1R3 caused a doubling of the number of cells responsive to denatonium, while causing a 35% decrease in Ca<sup>2+</sup> release per responsive cell. Traces are representative of ≥3 experiments. Bar graphs containing only two comparison groups were analyzed via t-test; bar graphs containing ≥3 groups were analyzed via ANOVA using Bonferroni's posttest; \**P* < 0.05, \*\**P* < 0.01, \*\*\**P* < 0.001, 'n.s.' represents no significance.

We have shown that T1R1/3 detects MEM AA's and signals through cAMP in Beas-2B's. Given the effects of 1x MEM AA's on ER Ca<sup>2+</sup> modulation, we evaluated the role that T1R1 and T1R3 have on ER Ca<sup>2+</sup> using thapsigargin. Surprisingly, we found that knocking down T1R1 (Figure 3c) or T1R3 (Figure 3d) also reduced ER Ca<sup>2+</sup> content by ~25%. While it is paradoxical that knocking down T1R1/3 expression decreases ER Ca<sup>2+</sup> content as does the

amino acids hypothesized to activate the receptor, it does support that T1R1 and T1R3 are involved in regulation of store  $\text{Ca}^{2+}$  content. Moreover, when T1R3 was knocked down, MEM AA treatment had no effects on store  $\text{Ca}^{2+}$  content (**Figure 3d**). These results demonstrate both a baseline role for T1R1/3 as well as a role for T1R1/3 in detection of amino acids, which ultimately modifies ER  $\text{Ca}^{2+}$ . We further investigated the downstream impact of reduced ER  $\text{Ca}^{2+}$  content on bitter compound signaling pathways.

Interestingly, in our T1R3 knockdown model, there was an increase in the number of cells that responded to 15 mM denatonium treatment, however each cell released less peak  $\text{Ca}^{2+}$  compared to the non-targeted RNAi controls. These observations support our findings that T1R3 knockdown cells have reduced ER  $\text{Ca}^{2+}$  content but also suggest an increase in sensitivity to bitter compound treatment through a related or independent mechanism. Notably, these experiments utilized HBSS without additional amino acids, and thus reflect baseline contributions of T1R3, either via constitutive activity or activation through some intracellular amino acid or metabolite.

While T1R1 and T1R3 have been demonstrated to signal through ERK1/2 and mTORC1 in MIN6 pancreatic  $\beta$  cells [32], we wanted to determine if these pathways were also altering downstream  $\text{Ca}^{2+}$  signaling pathways. To address this question, Beas-2B's were pretreated with 10  $\mu\text{M}$  of mTOR inhibitor rapamycin for 1hr, however they did not reveal and changes in  $\text{Ca}^{2+}$  release with T2R agonist denatonium (**Supplementary Figure S2**). These data suggest that the ability of T1Rs to alter ER  $\text{Ca}^{2+}$  content may be independent of mTORC1, making this a unique pathway in basal airway epithelial cells.

We wanted to determine if cAMP was signaling the decrease in ER  $\text{Ca}^{2+}$  levels. To approach this question, we tested the impact of a 1-hour pretreatment of Beas-2B's with either 100  $\mu\text{M}$  of isoproterenol or 20  $\mu\text{M}$  of forskolin. Interestingly, only treatment with isoproterenol decreased ER  $\text{Ca}^{2+}$  levels (**Figure 4a**). To verify these findings, we pre-treated Beas-2B's with 100  $\mu\text{M}$  of isoproterenol for 1 hour then utilized 15 mM denatonium to induce  $\text{Ca}^{2+}$  responses. A population analysis initially suggested there was no difference in  $\text{Ca}^{2+}$  signaling as measured by the average peak response of the cultures (**Figure 4b**). However, individual traces revealed that, in cultures treated with isoproterenol, a greater number of cells responded to the treatment but displayed a lower average peak (**Figure 4c**). Isoproterenol pretreatment led to a 30% increase in the number of responsive cells, but a 25% decrease in the peak fluorescence per cell (**Figure 4d**). Thus, while more cells were sensitized to the T2R agonist, those that responded demonstrated a reduced  $\text{Ca}^{2+}$  elevation. Isoproterenol activates  $\beta$ -adrenergic receptors, which may have other downstream effects, so we opted to also evaluate adenylyl cyclase-activator forskolin as a receptor-independent elevator of cAMP. Once more, there wasn't a significant difference in the average culture  $\text{Ca}^{2+}$  response to denatonium in cells treated for 1 hour with 20  $\mu\text{M}$  forskolin relative to untreated cells (**Figure 4e**). However, in these experiments, forskolin treatment elevated the number of cells responsive to denatonium by 30% but did not alter the peak fluorescence per cell (**Figure 4f**), which supports findings in **Figure 4a** that forskolin does not alter ER  $\text{Ca}^{2+}$  content. Together, these data demonstrate that cAMP elevation impacted the sensitivity of cells to denatonium-treatment, but ER  $\text{Ca}^{2+}$  content reduction may be signaled via other pathways or by localized cAMP microdomains that can be targeted by isoproterenol but not forskolin.



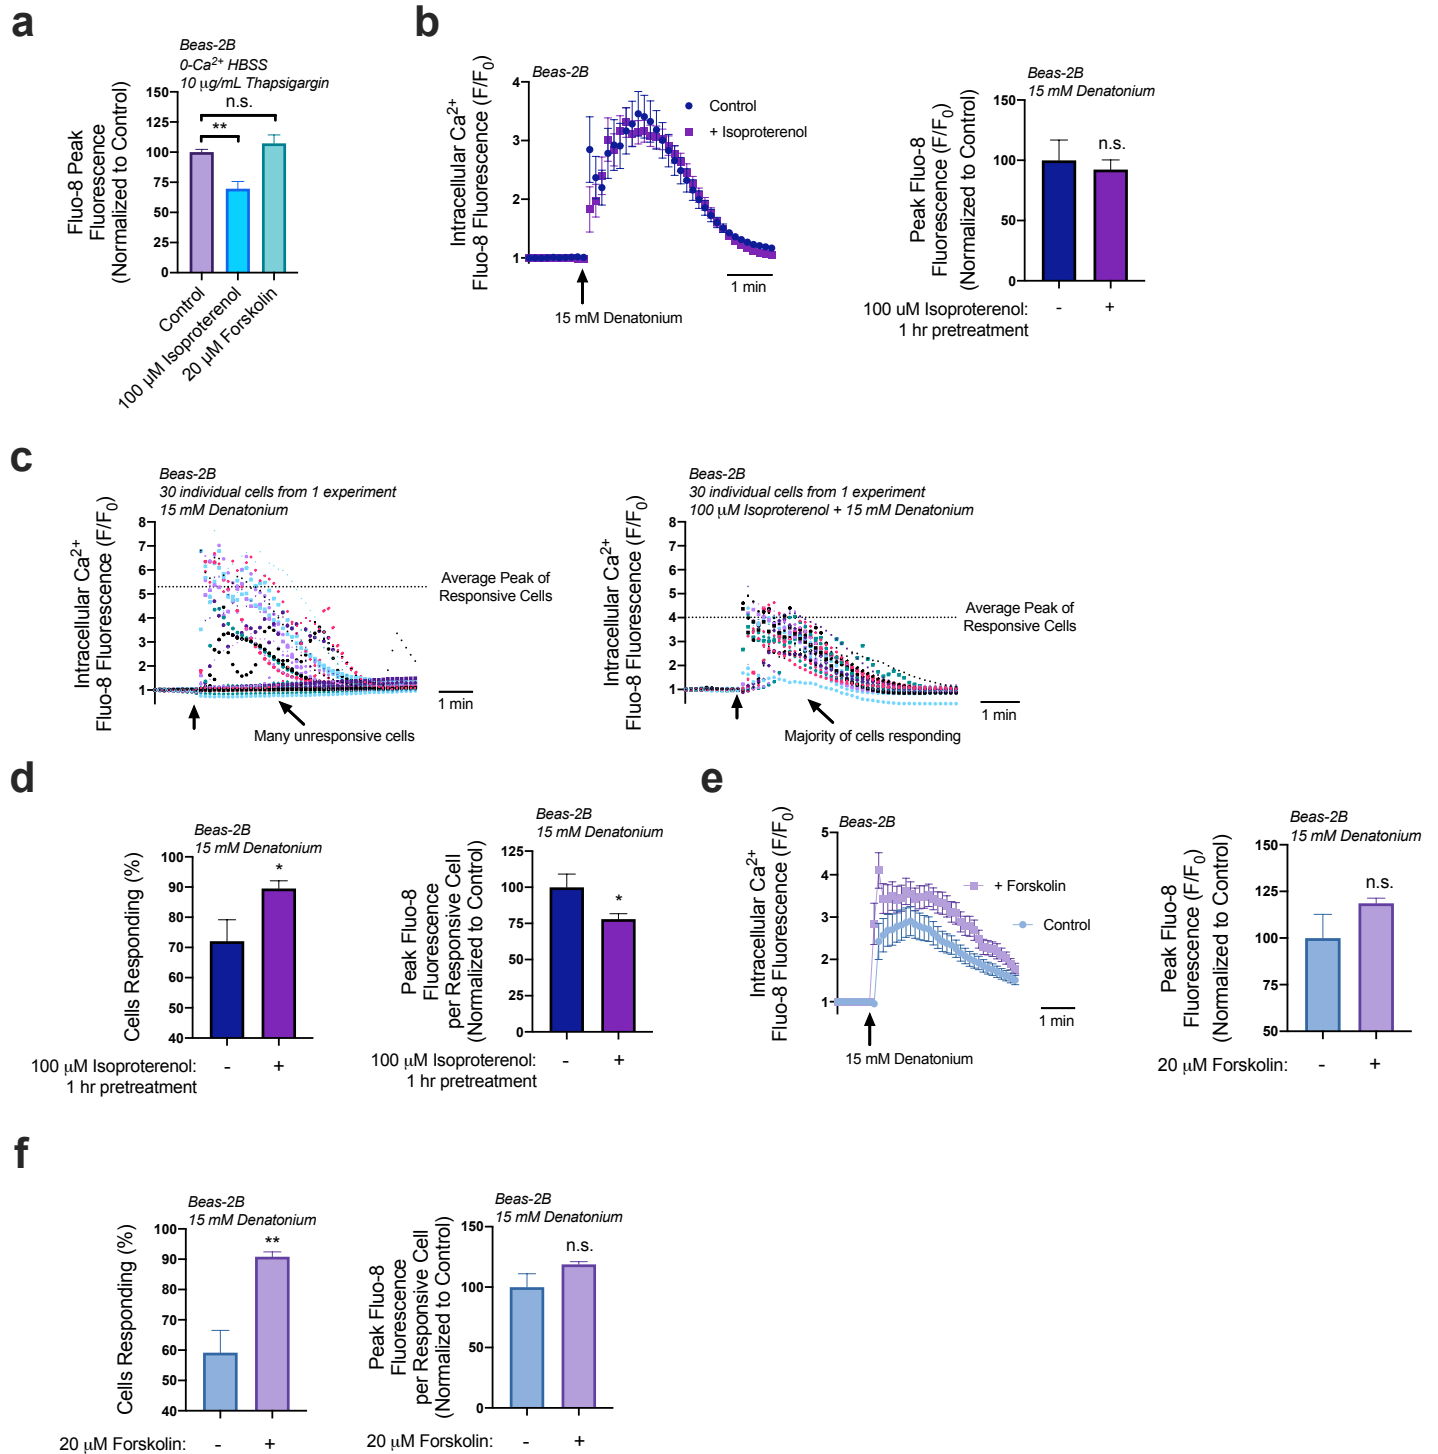

Figure 4. cAMP increases cell responsiveness to denatonium. (a) A 1-hour preincubation with isoproterenol (100 μM) decreased ER calcium by 30% while forskolin treatment (20 μM) had no significant effect on total ER Ca<sup>2+</sup>. (b) A 1-hour preincubation with isoproterenol (100 μM) had no effect on the average denatonium-induced Ca<sup>2+</sup> response relative to untreated samples. (c) A closer look at individual cell responses from a representative experiment from (b) revealed differences in the number of responsive cells and in the average peak Ca<sup>2+</sup> of the responsive cells. (d) Re-analysis of data from (b-c) showed that isoproterenol pretreatment (1 hr, 100 μM), increased the number of cells responsive to

---

denatonium (15 mM) but decreased peak  $\text{Ca}^{2+}$  release per cell by 25%. Traces are representative of  $\geq 3$  experiments. Bar graphs show mean  $\pm$  SEM from  $\geq 3$  experiments. Bar graphs with only 2 data points were analyzed by t-test, bar graphs of  $> 2$  data points analyzed by ANOVA using Tukey's post-test for multiple comparisons:  $*P < 0.05$ ,  $**P < 0.01$ , 'n.s.' represents no significance.

### 3.3 Reduction of ER $\text{Ca}^{2+}$ content via amino acid treatment hinders denatonium-induced apoptosis

Given the reduction in ER  $\text{Ca}^{2+}$  levels from 1x MEM AA treatment, we hypothesized that 1x MEM AA pre-treatment would lead to a decrease in T2R  $\text{Ca}^{2+}$  signaling. To test this, Beas-2B's were pre-treated with 1x MEM AA's for 1 hour (conditions shown above to create reduced ER  $\text{Ca}^{2+}$  stores) then treated with 15 mM denatonium. To our surprise, 1x MEM AA treatment caused a 30% increase in denatonium-induced  $\text{Ca}^{2+}$  release based on the population average (**Figure 5a**). However, with 1x MEM AA treatment, we found that four times the number of cells responded to the denatonium treatment, but each responsive cell elevated  $\text{Ca}^{2+}$  by only approximately half compared with cells without MEM AA's (**Figure 5b**). This supports that each cell has less  $\text{Ca}^{2+}$  to release, even though more cells are responding to denatonium and releasing  $\text{Ca}^{2+}$ . In the absence of extracellular  $\text{Ca}^{2+}$ , 1x MEM AA pre-treatment (1 hr) also reduced denatonium-stimulated  $\text{Ca}^{2+}$  release by ~50% per responsive cell, demonstrating that MEM AA treatment modifies intracellular  $\text{Ca}^{2+}$  release rather than  $\text{Ca}^{2+}$  influx (**Figure 5c**).

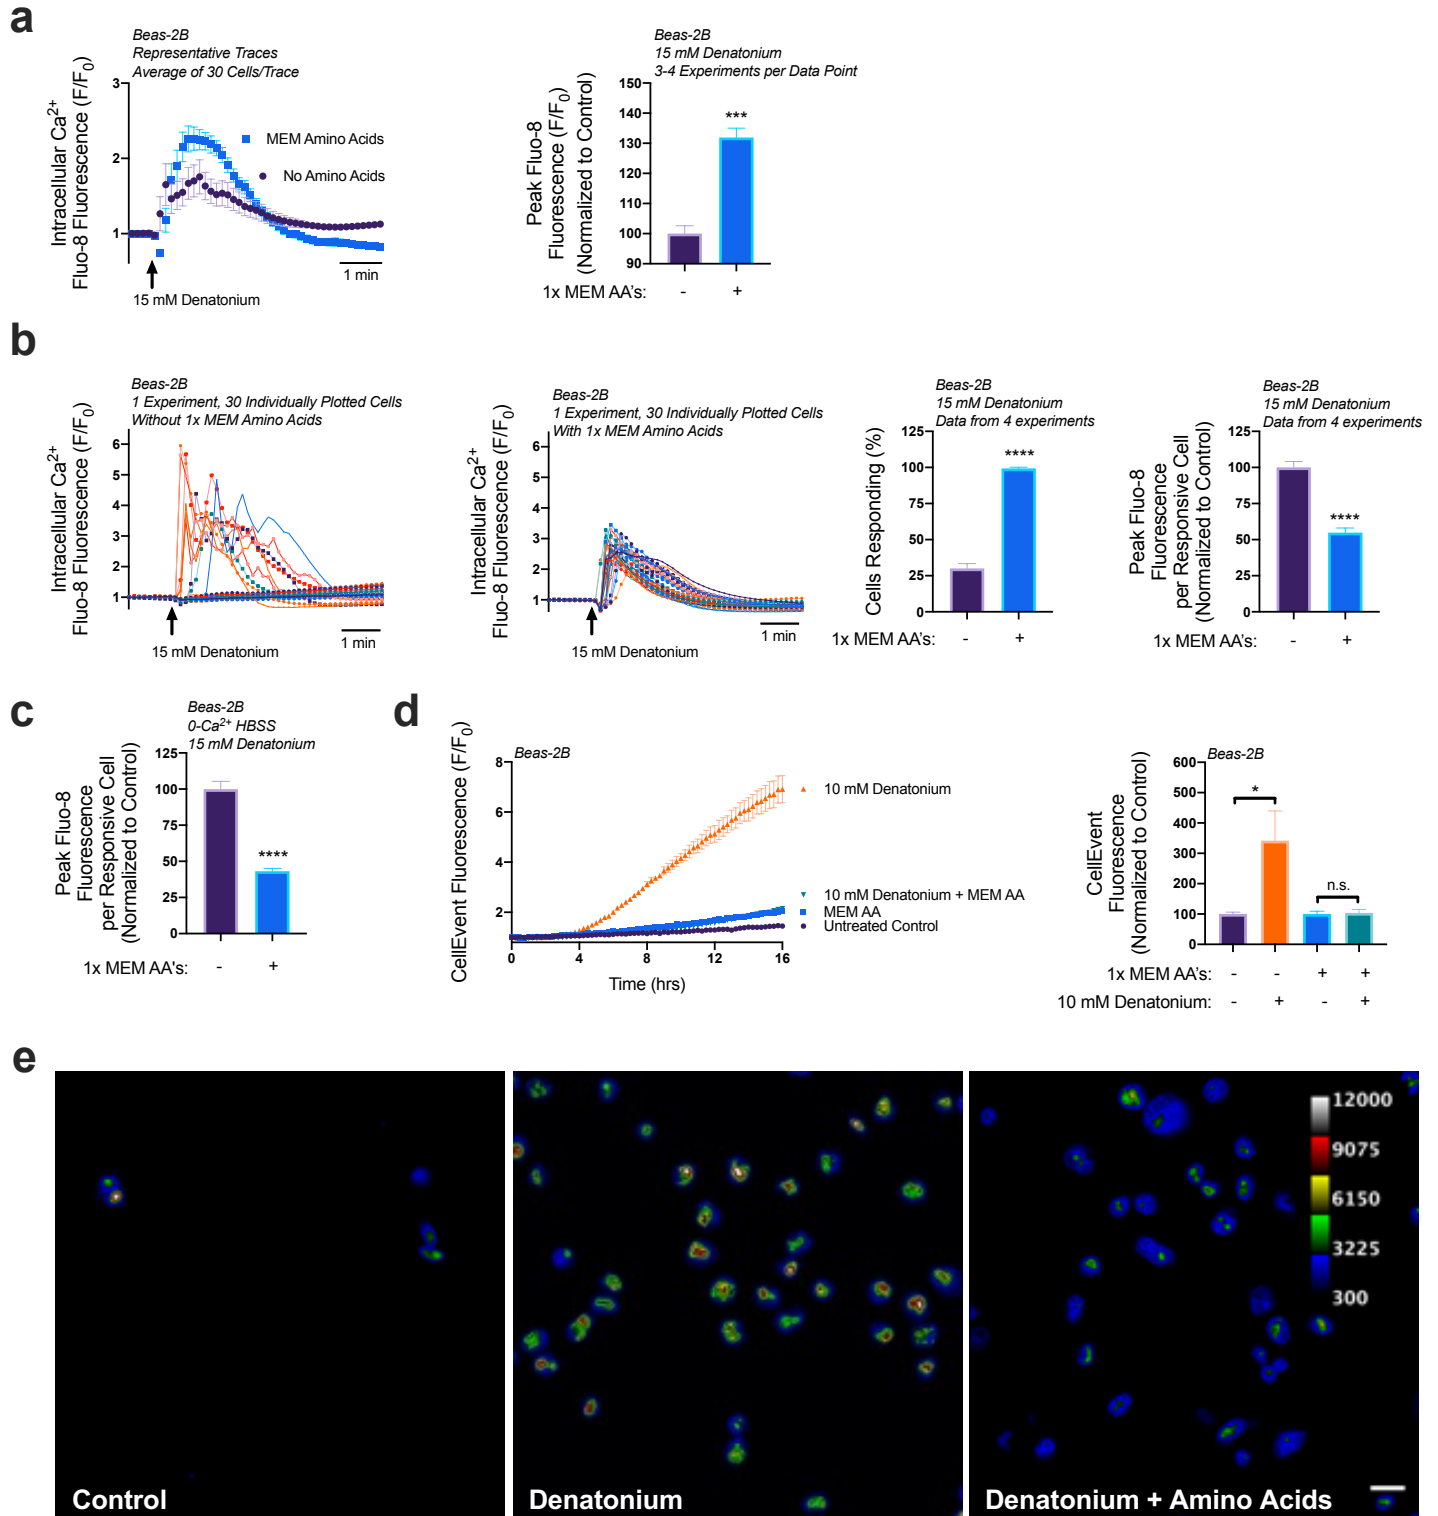

Figure 5. MEM amino acids reduce downstream denatonium-signaled caspase activity. (a) Pretreatment of Beas-2B's with MEM amino acids caused a ~30% increase in denatonium-induced  $\text{Ca}^{2+}$  elevations. (b) Closer analysis of data from (a) revealed that amino acid pretreatment increased the number of cells responsive to denatonium, but each cell had ~50% reduced peak  $\text{Ca}^{2+}$  elevations relative to denatonium-treated cells in HBSS without amino acids. (c) Denatonium-induced  $\text{Ca}^{2+}$  elevations originated from

intracellular Ca<sup>2+</sup> stores in both the presence and absence of MEM amino acids. (d) 1x MEM amino acid treatment (1 hr preincubation) blocked denatonium-signaled caspase activation as measured on a plate reader. € Cultures from experiments as in (d) visualized by microscopy revealed that some denatonium signaled caspase activity was still present, but significantly reduced. Traces are representative of ≥3 experiments. Bar graphs with only two comparison groups analyzed via t-test while bar graphs with >2 data comparison groups analyzed by ANOVA using Sidak's post-test for paired comparisons: \**P* < 0.05, \*\*\**P* < 0.001, \*\*\*\**P* < 0.0001, 'n.s.' represents no significance.

Previously, we've found that denatonium-induced nuclear/mitochondrial Ca<sup>2+</sup> signaling initiates mitochondrial membrane depolarization and induces apoptosis in basal airway epithelial cells [27]. The concentrations of denatonium necessary to activate nuclear Ca<sup>2+</sup> showed the same dose-dependency as those necessary to activate apoptosis, ranging from ≥5-25 mM of denatonium, with 10 mM being an intermediate dosage [27]. Additionally, blocking this Ca<sup>2+</sup> signaling utilizing BAPTA-AM, prevented the activation of executioner caspases 3/7 [27,41]. Given our observations that 1x MEM AA treatment led to a decrease in the peak Ca<sup>2+</sup> release per cell, we wanted to determine if this had any impact on the downstream Ca<sup>2+</sup>-signaled apoptosis.

To measure caspase 3/7 activity, we utilized CellEvent. CellEvent, a caspase 3/7 detection reagent, contains a DEVD peptide sequence, targeted by caspase 3 or 7, which when cleaved releases a dye that binds to DNA and fluoresces. After a 1-hour preincubation with 1x MEM AA's in HBSS, Beas-2B's were treated with 10 mM denatonium in the presence of CellEvent. Cells treated with denatonium + MEM AA's revealed a significantly lower fluorescence, indicating less caspase activity, relative to cells treated with denatonium only (**Figure 5d**). From fluorescence intensity alone as read on a plate reader, fluorescence in cells treated with denatonium + MEM AA's was not significantly different than cells treated with amino acids only, suggesting a complete block of apoptosis. However, using more sensitive microscopy, the addition of denatonium with amino acids did indeed initiate some caspase 3/7 activity compared with control (amino acids only), but at a far lesser extent than denatonium treatment without amino acids (**Figure 5e**). These data support our findings that MEM AA's increase the number of cells responsive to denatonium treatment but reduce the absolute Ca<sup>2+</sup> elevations per cell, and this likely reduces the denatonium-signaled apoptosis.

#### 4. Discussion

Here, we show that and T1R1 and T1R3 are expressed in basal airway epithelial cells. There, they likely function to detect components of MEM AA's and signal via cAMP elevation. While knocking down T1R1 or T1R3 lead to a reduction in ER Ca<sup>2+</sup>, given the absence of extracellular amino acids in these experiments, these results suggest that T1R1/3 may be constitutively active or have a role in detecting baseline intracellular amino acid levels. Interestingly, and contrary to initial expectations, treatment of wild-type Beas-2B's with 1x MEM AA's, suggested by other studies to activate T1R1/3, had a similar outcome as knocking down T1R1/3; 1x MEM AA treatment led to a decrease in ER Ca<sup>2+</sup> content that nonetheless required T1Rs. We observed that both treating wild-type Beas-2B's with 1x MEM AA's or knocking down T1R1/3 had similar effects: (1) ER Ca<sup>2+</sup> content decreased, (2) cultures released less calcium per cell in response to denatonium, (3) and the number of cells responding to denatonium increased. Together, from the perspective of ER Ca<sup>2+</sup> content, these data suggest that MEM AA's might be disrupting the T1R1/3 activity. If T1R1/3 is providing a baseline regulation of ER Ca<sup>2+</sup> content, one explanation is that something in the MEM amino acids may be acting as an inverse agonist. Additional research would be necessary to determine that this decrease in ER Ca<sup>2+</sup> content is solely due to amino acid-T1R1/3 interaction and not the action of another receptor. Furthermore, additional more detailed pharmacological studies, beyond

the scope of this study here, would be needed to test inverse agonism of the MEM-amino acid mixture.

While isoproterenol treatment also led to a decrease in ER Ca<sup>2+</sup> content, forskolin treatment did not. Given these observations, it seems unlikely that cAMP alone is responsible for the reduction of ER Ca<sup>2+</sup>. However, either knocking down T1R1/3, treating with 1x MEM AA, isoproterenol, or forskolin all led to an increased sensitization of cells to agonists that signal via Ca<sup>2+</sup> elevations. Thus, we hypothesize that while cAMP elevations may increase the number of cells that respond to agonists that signal via intracellular Ca<sup>2+</sup> pathways, the reduction of ER Ca<sup>2+</sup> content may occur through a separate, distinct pathway. Moreover, as there are many transcription factors that are sensitive to cAMP levels, the data showing changes in nuclear cAMP may also suggest a possible role for T1R1/3 in amino acid-induced transcriptional changes, which could be investigated in future studies.

T1R3 has been previously characterized to detect some L-amino acids via heterologous expression studies [9,42]. One study observed that human embryonic kidney cells (HEK's) expressing murine T1R1+T1R3 were able to detect 50 mM each of the following L-amino acids: Cys, Ala, Gln, Ser, Met, Asn, Gly, Thr, Arg, Val, Leu, His to activate intracellular Ca<sup>2+</sup> signaling [9]. A separate, but similar study revealed that HEK's expressing heterologous human T1R1/T1R3 detected 50 mM of each of the following L-amino acids: Ala, Ser, Gln, Asn, Arg, His, Asp, Glu while those expressing murine T1R1/3 had notable differences in the detectable amino acid profile [42]. Our 1x MEM AA mixture contained 0.6 mM Arg, 0.1 mM Cys, 0.2 mM His, 0.4 mM iso, 0.4 mM Leu, 0.1 mM Met, 0.2 mM Phe, 0.4 mM Thr, 0.05 mM Trp, 0.2 mM Tyr, and 0.4 mM Val. These concentrations are far lower than what was observed using overexpression models, but synergistic effects might occur. Our non-essential amino acid mixture contained 0.1 mM of each non-essential L-amino acid. Neither of our mixtures contained glutamine. While T1R1/3 may detect Glu, Ala, Asn, and Ser at higher concentrations than used here, the physiological relevance of such high levels, while important for taste on the tongue, remains unclear in terms basal airway epithelial cells. Future experiments utilizing knockdown models of either T1R1, T1R3, and/or both will be necessary to determine which specific amino acid(s) in our 1x MEM amino acid mixture is/are being detected and if higher dosages of non-essential amino acids are ligands for T1R1/3 in airway cells. The likely synergistic effects of several lower-level amino acids we are observing here suggests this requires highly detailed pharmacology studies using heterologous expression of T1R1/3 that are beyond the scope of this current study.

We did not observe an increase in intracellular Ca<sup>2+</sup> release in response to 1x MEM AA treatment at physiological pH. However, when added to a standard HBSS formulation containing 20 mM HEPES without any pH corrections, 1x MEM AA and 1x NEAA reduced the pH from 7.5 to 6.5. We did observe Ca<sup>2+</sup> elevations in response to amino acids when the HBSS was at pH 6.5. At this lowered pH, the majority of the Ca<sup>2+</sup> response was due to the 1x MEM AA's. This Ca<sup>2+</sup> elevation was also inhibited by pretreatment with 20 mM T1R3 antagonist lactisole, which did not alter the final pH of the solution. While this suggests a function of T1R1/3 during conditions where pH is lowered, the physiological relevance is not yet determined. Additionally, while we have not observed Ca<sup>2+</sup> elevations in response to amino acids at a physiological pH, this could also be due to variations in G protein subunits bound to T1R1/3 in our cell models used here. The promiscuity of GPCRs for G protein subunits has been well documented [43–46].

Through detecting amino acids, T1R1/3 was shown to activate ERK1/2 and mTORC1 through a Ca<sup>2+</sup> signaling pathway in pancreatic  $\beta$  cells [31,32] and in mouse neutrophils [47]. We show that T1R1/3's ability to alter Ca<sup>2+</sup> signaling pathways reported here is likely independent of mTOR [31,32] as rapamycin treatment did not alter denatonium- Ca<sup>2+</sup> signaling like MEM-AAs. While ERK1/2 and mTORC1 may still be activated in our models, this is a distinct, non-canonical pathway of umami receptor signaling. Parallel effects of ERK1/2 and/or mTORC1 activation will be investigated in future studies.

Ultimately this reduction in ER Ca<sup>2+</sup> content led to a reduction in intracellular Ca<sup>2+</sup> elevations signaled by denatonium. Thus, amino acids may play a protective role in reducing apoptosis via the umami T1R1/3 receptor. When we previously measured NO production from bitter compounds such as denatonium, flufenamic acid [27], or diphenhydramine [5], we utilized HBSS containing 1x MEM AA's as a source of arginine for NO production. Given that bitter compounds are still able to elicit a Ca<sup>2+</sup>-signaled NO response even in the presence of 1x MEM AA's, our current work suggests that the addition of 1x MEM AA's to a topical T2R agonist therapeutic may help to diminish apoptotic signaling pathways without preventing stimulation of NO production.

## 5. Conclusions

Our findings demonstrate a previously undescribed function for T1R1/3 in airway epithelial cells as a receptor for amino acids that signals through cAMP and as a regulator of ER Ca<sup>2+</sup> content. Furthermore, the addition of 1x MEM AA's reduced ER Ca<sup>2+</sup> content and greatly impaired apoptosis signaling via denatonium treatment. Therefore, amino acids may be useful to employ in therapeutics containing bitter compounds to repress unwanted induction of apoptosis.

## Supplementary Materials

The following supporting information can be downloaded:

Table S1. A list of reagents used in this study; Table S2. Formulations of 1x MEM AA and 1x NEAA used in this study; Figure S1. Amino acids induce Ca<sup>2+</sup> elevations in Beas-2B's at pH 6.5.; Figure S2. mTORC1 pathways do not impact ER Ca<sup>2+</sup> content.

## Author Contributions

**Derek B. McMahon:** Conceptualization, Investigation, Methodology, Formal analysis, Writing – original draft, Writing – review & editing, Project administration. **Jennifer Jolivet:** Investigation. **Li Eon Kuek:** Investigation. **Nithin D. Adappa:** Resources, Data curation, Project administration. **James N. Palmer:** Resources, Data curation, Project administration. **Robert J. Lee:** Supervision, Project administration, Conceptualization, Writing – review & editing, Formal analysis, Funding acquisition, Resources.

## Funding Acknowledgements

This study was supported by National Institutes of Health Grants DC016309 (R.J.L.), AI167971 (N.D.A., J.N.P., R.J.L.), and Cystic Fibrosis Foundation Grant LEE21G0.

## Informed Consent

Informed consent was received from all study subjects.

## Data Availability

All data are available by contacting [rjl@pennmedicine.upenn.edu](mailto:rjl@pennmedicine.upenn.edu)

## Acknowledgements

We thank Maureen Victoria for excellent technical expertise and many helpful discussions.

## Conflicts of Interest

The authors state that there are no conflicts of interest.

## References

1. Shah, A.S.; Ben-Shahar, Y.; Moninger, T.O.; Kline, J.N.; Welsh, M.J. Motile Cilia of Human Airway Epithelia Are Chemosensory. *Science* **2009**, *325*, 1131–1134.
2. Freund, J.R.; Mansfield, C.J.; Doghramji, L.J.; Adappa, N.D.; Palmer, J.N.; Kennedy, D.W.; Reed, D.R.; Jiang, P.; Lee, R.J. Activation of Airway Epithelial Bitter Taste Receptors by *Pseudomonas Aeruginosa* Quinolones Modulates Calcium, Cyclic-AMP, and Nitric Oxide Signaling. *J Biol Chem* **2018**, *293*, 9824–9840, doi:10.1074/jbc.RA117.001005.
3. Tizzano, M.; Gulbransen, B.D.; Vandenbeuch, A.; Clapp, T.R.; Herman, J.P.; Sibhatu, H.M.; Churchill, M.E.; Silver, W.L.; Kinnamon, S.C.; Finger, T.E. Nasal Chemosensory Cells Use Bitter Taste Signaling to Detect Irritants and Bacterial Signals. *Proc Natl Acad Sci U S A* **2010**, *107*, 3210–3215.
4. Lee, R.J.; Xiong, G.; Kofonow, J.M.; Chen, B.; Lysenko, A.; Jiang, P.; Abraham, V.; Doghramji, L.; Adappa, N.D.; Palmer, J.N.; et al. T2R38 Taste Receptor Polymorphisms Underlie Susceptibility to Upper Respiratory Infection. *J Clin Invest* **2012**, *122*, 4145–4159.
5. Kuek, L.E.; McMahan, D.B.; Ma, R.Z.; Miller, Z.A.; Jolivet, J.F.; Adappa, N.D.; Palmer, J.N.; Lee, R.J. Cilia Stimulatory and Antibacterial Activities of T2R Bitter Taste Receptor Agonist Diphenhydramine: Insights into Repurposing Bitter Drugs for Nasal Infections. *Pharmaceuticals* **2022**, *15*, 452, doi:10.3390/ph15040452.
6. Tizzano, M.; Cristofolletti, M.; Sbarbati, A.; Finger, T.E. Expression of Taste Receptors in Solitary Chemosensory Cells of Rodent Airways. *BMC Pulm Med* **2011**, *11*, 3.
7. Gulbransen, B.D.; Clapp, T.R.; Finger, T.E.; Kinnamon, S.C. Nasal Solitary Chemoreceptor Cell Responses to Bitter and Trigeminal Stimulants in Vitro. *J Neurophysiol* **2008**, *99*, 2929–2937, doi:10.1152/jn.00066.2008.
8. Barham, H.P.; Cooper, S.E.; Anderson, C.B.; Tizzano, M.; Kingdom, T.T.; Finger, T.E.; Kinnamon, S.C.; Ramakrishnan, V.R. Solitary Chemosensory Cells and Bitter Taste Receptor Signaling in Human Sinonasal Mucosa. *Int Forum Allergy Rhinol* **2013**, *3*, 450–457.
9. Nelson, G.; Chandrashekar, J.; Hoon, M.A.; Feng, L.; Zhao, G.; Ryba, N.J.P.; Zuker, C.S. An Amino-Acid Taste Receptor. *Nature* **2002**, *416*, 199–202, doi:10.1038/nature726.
10. Nelson, G.; Hoon, M.A.; Chandrashekar, J.; Zhang, Y.; Ryba, N.J.; Zuker, C.S. Mammalian Sweet Taste Receptors. *Cell* **2001**, *106*, 381–390, doi:10.1016/s0092-8674(01)00451-2.
11. Li, X.; Staszewski, L.; Xu, H.; Durick, K.; Zoller, M.; Adler, E. Human Receptors for Sweet and Umami Taste. *Proc Natl Acad Sci U S A* **2002**, *99*, 4692–4696, doi:10.1073/pnas.072090199.
12. Clapp, T.R.; Trubey, K.R.; Vandenbeuch, A.; Stone, L.M.; Margolskee, R.F.; Chaudhari, N.; Kinnamon, S.C. Tonic Activity of Galpha-Gustducin Regulates Taste Cell Responsivity. *FEBS Lett* **2008**, *582*, 3783–3787.
13. McLaughlin, S.K.; McKinnon, P.J.; Margolskee, R.F. Gustducin Is a Taste-Cell-Specific G Protein Closely Related to the Transducins. *Nature* **1992**, *357*, 563–569, doi:10.1038/357563a0.
14. Wong, G.T.; Gannon, K.S.; Margolskee, R.F. Transduction of Bitter and Sweet Taste by Gustducin. *Nature* **1996**, *381*, 796–800, doi:10.1038/381796a0.
15. Ming, D.; Ruiz-Avila, L.; Margolskee, R.F. Characterization and Solubilization of Bitter-Responsive Receptors That Couple to Gustducin. *Proc. Natl. Acad. Sci. U.S.A.* **1998**, *95*, 8933–8938, doi:10.1073/pnas.95.15.8933.
16. Huang, L.; Shanker, Y.G.; Dubauskaite, J.; Zheng, J.Z.; Yan, W.; Rosenzweig, S.; Spielman, A.I.; Max, M.; Margolskee, R.F. G $\gamma$ 13 Colocalizes with Gustducin in Taste Receptor Cells and Mediates IP<sub>3</sub> Responses to Bitter Denatonium. *Nat Neurosci* **1999**, *2*, 1055–1062, doi:10.1038/15981.
17. Zhang, Y.; Hoon, M.A.; Chandrashekar, J.; Mueller, K.L.; Cook, B.; Wu, D.; Zuker, C.S.; Ryba, N.J. Coding of Sweet, Bitter, and Umami Tastes: Different Receptor Cells Sharing Similar Signaling Pathways. *Cell* **2003**, *112*, 293–301.
18. Braun, T.; Mack, B.; Kramer, M.F. Solitary Chemosensory Cells in the Respiratory and Vomeronasal Epithelium of the Human Nose: A Pilot Study. *Rhinology* **2011**, *49*, 507–512, doi:10.4193/Rhino.11.121.
19. Lee, R.J.; Kofonow, J.M.; Rosen, P.L.; Siebert, A.P.; Chen, B.; Doghramji, L.; Xiong, G.; Adappa, N.D.; Palmer, J.N.; Kennedy, D.W.; et al. Bitter and Sweet Taste Receptors Regulate Human Upper Respiratory Innate Immunity. *J Clin Invest* **2014**, *124*, 1393–1405.
20. Gudis, D.; Zhao, K.Q.; Cohen, N.A. Acquired Cilia Dysfunction in Chronic Rhinosinusitis. *Am J Rhinol Allergy* **2012**, *26*, 1–6.

21. Thomas, B.; Koh, M.S.; O'Callaghan, C.; Allen, J.C.; Rutman, A.; Hirst, R.A.; Connolly, J.; Low, S.Y.; Thun How, O.; Chian Min, L.; et al. Dysfunctional Bronchial Cilia Are a Feature of Chronic Obstructive Pulmonary Disease (COPD). *COPD: Journal of Chronic Obstructive Pulmonary Disease* **2021**, *18*, 657–663, doi:10.1080/15412555.2021.1963695.
22. Leopold, P.L.; O'Mahony, M.J.; Lian, X.J.; Tilley, A.E.; Harvey, B.-G.; Crystal, R.G. Smoking Is Associated with Shortened Airway Cilia. *PLoS ONE* **2009**, *4*, e8157, doi:10.1371/journal.pone.0008157.
23. Dunnill, M.S. THE PATHOLOGY OF ASTHMA, WITH SPECIAL REFERENCE TO CHANGES IN THE BRONCHIAL MUCOSA. *Journal of Clinical Pathology* **1960**, *13*, 27–33, doi:10.1136/jcp.13.1.27.
24. Tilley, A.E.; Walters, M.S.; Shaykhiev, R.; Crystal, R.G. Cilia Dysfunction in Lung Disease. *Annu Rev Physiol* **2015**, *77*, 379–406, doi:10.1146/annurev-physiol-021014-071931.
25. Mynatt, R.G.; Do, J.; Janney, C.; Sindwani, R. Squamous Metaplasia and Chronic Rhinosinusitis: A Clinicopathological Study. *Am J Rhinol* **2008**, *22*, 602–605.
26. Pawankar, R.; Nonaka, M. Inflammatory Mechanisms and Remodeling in Chronic Rhinosinusitis and Nasal Polyps. *Curr Allergy Asthma Rep* **2007**, *7*, 202–208.
27. McMahon, D.B.; Kuek, L.E.; Johnson, M.E.; Johnson, P.O.; Horn, R.L.J.; Carey, R.M.; Adappa, N.D.; Palmer, J.N.; Lee, R.J. The Bitter End: T2R Bitter Receptor Agonists Elevate Nuclear Calcium and Induce Apoptosis in Non-Ciliated Airway Epithelial Cells. *Cell Calcium* **2021**, *101*, 102499, doi:10.1016/j.ceca.2021.102499.
28. Wink, D.A.; Kasprzak, K.S.; Maragos, C.M.; Elespuru, R.K.; Misra, M.; Dunams, T.M.; Cebula, T.A.; Koch, W.H.; Andrews, A.W.; Allen, J.S. DNA Deaminating Ability and Genotoxicity of Nitric Oxide and Its Progenitors. *Science* **1991**, *254*, 1001–1003, doi:10.1126/science.1948068.
29. Juedes, M.J.; Wogan, G.N. Peroxynitrite-Induced Mutation Spectra of PSP189 Following Replication in Bacteria and in Human Cells. *Mutat Res* **1996**, *349*, 51–61, doi:10.1016/0027-5107(95)00152-2.
30. Sternberg, J.; Mabbott, N.; Sutherland, I.; Liew, F.Y. Inhibition of Nitric Oxide Synthesis Leads to Reduced Parasitemia in Murine Trypanosoma Brucei Infection. *Infect Immun* **1994**, *62*, 2135–2137, doi:10.1128/iai.62.5.2135-2137.1994.
31. Wauson, E.M.; Zaganjor, E.; Lee, A.-Y.; Guerra, M.L.; Ghosh, A.B.; Bookout, A.L.; Chambers, C.P.; Jivan, A.; McGlynn, K.; Hutchison, M.R.; et al. The G Protein-Coupled Taste Receptor T1R1/T1R3 Regulates MTORC1 and Autophagy. *Mol Cell* **2012**, *47*, 851–862, doi:10.1016/j.molcel.2012.08.001.
32. Wauson, E.M.; Guerra, M.L.; Dyachok, J.; McGlynn, K.; Giles, J.; Ross, E.M.; Cobb, M.H. Differential Regulation of ERK1/2 and MTORC1 Through T1R1/T1R3 in MIN6 Cells. *Mol Endocrinol* **2015**, *29*, 1114–1122, doi:10.1210/ME.2014-1181.
33. Odaka, H.; Arai, S.; Inoue, T.; Kitaguchi, T. Genetically-Encoded Yellow Fluorescent CAMP Indicator with an Expanded Dynamic Range for Dual-Color Imaging. *PLoS One* **2014**, *9*, e100252.
34. Depry, C.; Allen, M.D.; Zhang, J. Visualization of PKA Activity in Plasma Membrane Microdomains. *Mol Biosyst* **2011**, *7*, 52–58, doi:10.1039/c0mb00079e.
35. Sample, V.; DiPilato, L.M.; Yang, J.H.; Ni, Q.; Saucerman, J.J.; Zhang, J. Regulation of Nuclear PKA Revealed by Spatiotemporal Manipulation of Cyclic AMP. *Nat Chem Biol* **2012**, *8*, 375–382, doi:10.1038/nchembio.799.
36. Chen, Y.; Saulnier, J.L.; Yellen, G.; Sabatini, B.L. A PKA Activity Sensor for Quantitative Analysis of Endogenous GPCR Signaling via 2-Photon FRET-FLIM Imaging. *Front. Pharmacol.* **2014**, *5*, doi:10.3389/fphar.2014.00056.
37. Lacabartz-Porret, C.; Corvazier, E.; Kovács, T.; Bobe, R.; Bredoux, R.; Launay, S.; Papp, B.; Enouf, J. Platelet Sarco/Endoplasmic Reticulum Ca<sup>2+</sup>ATPase Isoform 3b and Rap 1b: Interrelation and Regulation in Physiopathology. *Biochemical Journal* **1998**, *332*, 173–181, doi:10.1042/bj3320173.
38. Pereira, L.; Métrich, M.; Fernández-Velasco, M.; Lucas, A.; Leroy, J.; Perrier, R.; Morel, E.; Fischmeister, R.; Richard, S.; Bénitah, J.-P.; et al. The CAMP Binding Protein Epac Modulates Ca<sup>2+</sup> Sparks by a Ca<sup>2+</sup>/Calmodulin Kinase Signalling Pathway in Rat Cardiac Myocytes: EPAC and Calcium Handling. *The Journal of Physiology* **2007**, *583*, 685–694, doi:10.1113/jphysiol.2007.133066.
39. Hatakeyama, H.; Takahashi, N.; Kishimoto, T.; Nemoto, T.; Kasai, H. Two CAMP-Dependent Pathways Differentially Regulate Exocytosis of Large Dense-Core and Small Vesicles in Mouse  $\beta$ -Cells: Regulation of Exocytosis by Epac and PKA. *The Journal of Physiology* **2007**, *582*, 1087–1098, doi:10.1113/jphysiol.2007.135228.



40. Kang, G.; Joseph, J.W.; Chepurny, O.G.; Monaco, M.; Wheeler, M.B.; Bos, J.L.; Schwede, F.; Genieser, H.-G.; Holz, G.G. Epac-Selective CAMP Analog 8-PCPT-2'-O-Me-CAMP as a Stimulus for Ca<sup>2+</sup>-Induced Ca<sup>2+</sup> Release and Exocytosis in Pancreatic  $\beta$ -Cells. *Journal of Biological Chemistry* **2003**, *278*, 8279–8285, doi:10.1074/jbc.M211682200.
41. Carey, R.M.; McMahon, D.B.; Miller, Z.A.; Kim, T.; Rajasekaran, K.; Gopallawa, I.; Newman, J.G.; Basu, D.; Nead, K.T.; White, E.A.; et al. T2R Bitter Taste Receptors Regulate Apoptosis and May Be Associated with Survival in Head and Neck Squamous Cell Carcinoma. *Mol Oncol* **2021**, doi:10.1002/1878-0261.13131.
42. Toda, Y.; Nakagita, T.; Hayakawa, T.; Okada, S.; Narukawa, M.; Imai, H.; Ishimaru, Y.; Misaka, T. Two Distinct Determinants of Ligand Specificity in T1R1/T1R3 (the Umami Taste Receptor). *J Biol Chem* **2013**, *288*, 36863–36877, doi:10.1074/jbc.M113.494443.
43. Alkhatib, O.; da Costa, R.; Gentry, C.; Quallo, T.; Mannebach, S.; Weissgerber, P.; Freichel, M.; Philipp, S.E.; Bevan, S.; Andersson, D.A. Promiscuous G-Protein-Coupled Receptor Inhibition of Transient Receptor Potential Melastatin 3 Ion Channels by G $\beta\gamma$  Subunits. *J. Neurosci.* **2019**, *39*, 7840–7852, doi:10.1523/JNEUROSCI.0882-19.2019.
44. Kostenis, E.; Waelbroeck, M.; Milligan, G. Techniques: Promiscuous G $\alpha$  Proteins in Basic Research and Drug Discovery. *Trends in Pharmacological Sciences* **2005**, *26*, 595–602, doi:10.1016/j.tips.2005.09.007.
45. Milligan, G. Is Promiscuity of G Protein Interaction an Issue in the Classification of Receptors? *Ann NY Acad Sci* **1997**, *812*, 126–132, doi:10.1111/j.1749-6632.1997.tb48152.x.
46. Hermans, E. Biochemical and Pharmacological Control of the Multiplicity of Coupling at G-Protein-Coupled Receptors. *Pharmacology & Therapeutics* **2003**, *99*, 25–44, doi:10.1016/S0163-7258(03)00051-2.
47. Lee, N.; Jung, Y.S.; Lee, H.Y.; Kang, N.; Park, Y.J.; Hwang, J.S.; Bahk, Y.Y.; Koo, J.; Bae, Y.-S. Mouse Neutrophils Express Functional Umami Taste Receptor T1R1/T1R3. *BMB Rep* **2014**, *47*, 649–654, doi:10.5483/bmbrep.2014.47.11.185.
