# Supplementary material for: Savory Signaling: T1R umami receptor modulates endoplasmic reticulum calcium store content and release dynamics in airway epithelial cells
Source: bioRxiv or medRxiv preprint supplement (doi:10.1101/2022.12.07.519477), 2022-12-10
Supplement: Supplementary file [file media-1.pdf]

## Supplementary Materials

McMahon, *et al.*, "Savory Signaling: T1R umami receptor modulates endoplasmic reticulum calcium store content and release dynamics in airway epithelial cells."

| Antibodies Used                          | Source                      | Catalogue Number |
|------------------------------------------|-----------------------------|------------------|
| anti-T1R1                                | ThermoFisher Scientific     | PA528771         |
| anti-T1R3                                | Abcam                       | ab150525         |
| Cell Lines Used                          | Source                      | Catalogue Number |
| Beas-2B                                  | ATCC                        | CRL-9609         |
| Primary human bronchial epithelial cells | Lonza                       | CC-2450          |
| Primary nasal epithelial cells           | This Study                  | N/A              |
| Chemicals Used                           | Source                      | Catalogue Number |
| Bovine Serum Albumin                     | Millipore Sigma             | A2153            |
| CellEvent Caspase 3/7 Reagent            | ThermoFisher Scientific     | C10423           |
| DAF-FM diacetate                         | ThermoFisher Scientific     | D23844           |
| Denatonium Benzoate                      | Millipore Sigma             | D5765            |
| Fluo-8 AM                                | Abcam                       | ab142773         |
| Forskolin                                | Millipore Sigma             | F3917            |
| Fura-2 AM                                | ThermoFisher Scientific     | F1221            |
| Isoproterenol                            | Millipore Sigma             | I6504            |
| Lipofectamine 3000                       | ThermoFisher Scientific     | L3000075         |
| MEM Amino Acids                          | ThermoFisher Scientific     | 11130051         |
| Non-Essential Amino Acids                | ThermoFisher Scientific     | 11140050         |
| Thapsigargin                             | Cayman Chemical             | 10522            |
| UTP                                      | ThermoFisher Scientific     | AAJ23160-03      |
| Recombinant DNA - Function               | Source                      | Catalogue Number |
| AKAR4 - intracellular PKA activity       | Addgene                     | 61619            |
| AKAR4-nls - nuclear PKA activity         | Addgene                     | 138217           |
| Flamindo2 - intracellular cAMP           | Addgene                     | 73938            |
| nls-Flamindo2 - nuclear cAMP             | Addgene                     | 73939            |
| RNAi used                                | Source                      | Catalogue Number |
| TAS1R1 DsiRNA Kit                        | Integrated DNA Technologies | hs.Ri.TAS1R1.13  |
| TAS1R3 DsiRNA Kit                        | Integrated DNA Technologies | hs.Ri.TAS1R3.13  |
| Taqman Probes for qPCR                   | Source                      | Catalogue Number |
| TAS1R1                                   | ThermoFisher Scientific     | Hs01547926_g1    |
| TAS1R2                                   | ThermoFisher Scientific     | Hs00541095_m1    |
| TAS1R3                                   | ThermoFisher Scientific     | Hs00877446_g1    |
| UBC                                      | ThermoFisher Scientific     | Hs01871556_s1    |

**Table S1.** A list of reagents used in this study.

**a****MEM Amino Acids, Essential Amino Acids**

ThermoFisher Product Number 11130051

| Amino Acid                                 | 1x Concentration (mM) |
|--------------------------------------------|-----------------------|
| L-Arginine hydrochloride                   | 0.60                  |
| L-Cystine                                  | 0.10                  |
| L-Histidine hydrochloride-H <sub>2</sub> O | 0.20                  |
| L-Isoleucine                               | 0.40                  |
| L-Leucine                                  | 0.40                  |
| L-Lysine hydrochloride                     | 0.40                  |
| L-Methionine                               | 0.10                  |
| L-Phenylalanine                            | 0.20                  |
| L-Threonine                                | 0.40                  |
| L-Tryptophan                               | 0.05                  |
| L-Tyrosine                                 | 0.20                  |
| L-Valine                                   | 0.40                  |

**b****MEM Non-Essential Amino Acids**

ThermoFisher Product Number 11140050

| Amino Acid      | 1x Concentration (mM) |
|-----------------|-----------------------|
| Glycine         | 0.1                   |
| L-Alanine       | 0.1                   |
| L-Asparagine    | 0.1                   |
| L-Aspartic acid | 0.1                   |
| L-Glutamic Acid | 0.1                   |
| L-Proline       | 0.1                   |
| L-Serine        | 0.1                   |

**Table S2.** Formulations of 1x MEM AA (a) and 1x NEAA (b) used in this study.

**a**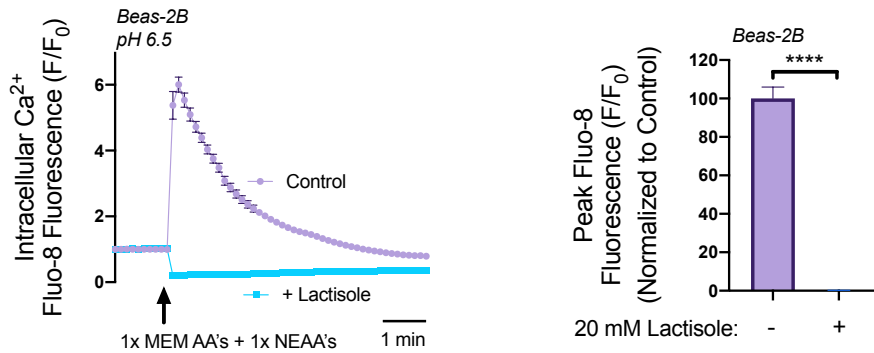**b**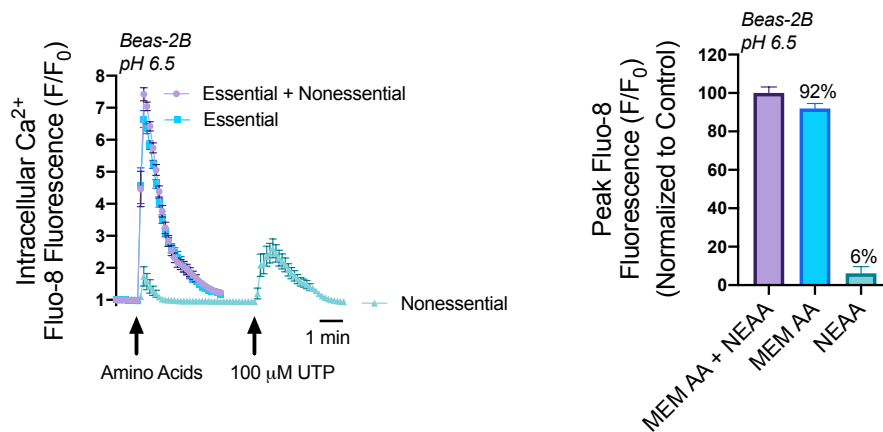

**Figure S1.** Amino acids induce Ca<sup>2+</sup> elevations in Beas-2B's at pH 6.5. (a) Beas-2B's were loaded with Ca<sup>2+</sup> detecting dye Fluo-8 AM and pre-treated with 20 mM lactisole for 1 hour then stimulated with a mixture of 1x MEM AA and 1x NEAA's. At pH 6.5 1x MEM AA's and 1x NEAA stimulate a Ca<sup>2+</sup> response that is inhibited by lactisole. (b) Maintaining a pH of 6.5, the majority of the Ca<sup>2+</sup> elevations (approximately 92%) are due to components of the 1x MEM AA mixture while 1x NEAA contributed minimally to Ca<sup>2+</sup> signaling pathways (approximately 6% of the combined release). Significance determined by t-test \*\*\*\**p* < 0.0001

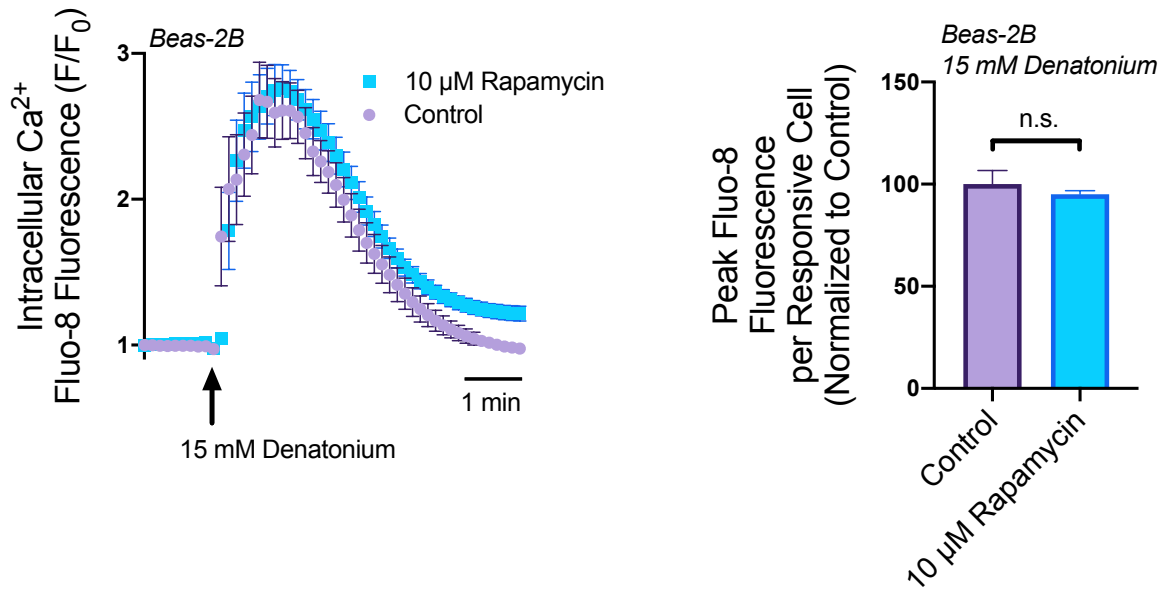

**Figure S2.** mTORC1 pathways do not impact ER  $\text{Ca}^{2+}$  content. Beas-2B's loaded with Fluo-8 AM were treated with 10  $\mu\text{M}$  of rapamycin for 1 hour then stimulated with 15 mM denatonium. Rapamycin had no impact on the population's peak  $\text{Ca}^{2+}$  levels or the peak  $\text{Ca}^{2+}$  release per cell, showing that there was no observable effect on  $\text{Ca}^{2+}$  signaling pathways. Significance determined by t-test 'n.s.' represents no significance.
